# Supplementary material for: Identification of an 88-microRNA signature in whole blood for diagnosis of hepatocellular carcinoma and other chronic liver diseases
Source: publisher site journal article supplement (doi:10.18632/aging.101253), 2017-06-27
Supplement: Supplementary file 1 [file aging-v9i6-101253-supplementary-material-SD1.pdf]

**SUPPLEMENTARY MATERIAL**

**Supporting Table 1. The expression levels of 88 miRNAs of HC, CHB, LC, and HCC groups in the discovery set.**

| miRNA            | Average value in HC | Average value in CHB | Average value in LC | Average value in HCC | Change fold (Patients/HC) |
|------------------|---------------------|----------------------|---------------------|----------------------|---------------------------|
| hsa-let-7a-2-3p  | 405                 | 4610                 | 2588                | 662                  | 5.33                      |
| hsa-let-7d-5p    | 2498                | 21293                | 15304               | 8307                 | 5.50                      |
| hsa-let-7g-3p    | 3443                | 12270                | 6735                | 7283                 | 2.50                      |
| hsa-miR-103a-3p  | 8509                | 3498                 | 3856                | 3109                 | 0.40                      |
| hsa-miR-1247-5p  | 414                 | 16697                | 12440               | 3681                 | 12.03                     |
| hsa-miR-1248     | 405                 | 4879                 | 3602                | 838                  | 6.17                      |
| hsa-miR-126-3p   | 1306                | 13331                | 11640               | 2144                 | 5.58                      |
| hsa-miR-130a-3p  | 11153               | 3562                 | 1444                | 3957                 | 0.27                      |
| hsa-miR-132-5p   | 1780                | 13949                | 9531                | 3249                 | 4.45                      |
| hsa-miR-150-5p   | 1459                | 45079                | 37385               | 10436                | 17.98                     |
| hsa-miR-1537     | 2417                | 14258                | 6090                | 8928                 | 4.29                      |
| hsa-miR-154-3p   | 2865                | 31662                | 22702               | 5106                 | 6.03                      |
| hsa-miR-18b-5p   | 2035                | 11121                | 4390                | 4276                 | 3.09                      |
| hsa-miR-194-3p   | 1255                | 8254                 | 3054                | 1499                 | 3.22                      |
| hsa-miR-199a-5p  | 8029                | 20463                | 13660               | 8748                 | 2.28                      |
| hsa-miR-19b-1-5p | 8566                | 3145                 | 1822                | 3893                 | 0.34                      |
| hsa-miR-221-3p   | 1201                | 12836                | 13183               | 1510                 | 7.19                      |
| hsa-miR-23a-5p   | 625                 | 10196                | 7067                | 1163                 | 8.44                      |
| hsa-miR-25-5p    | 592                 | 8282                 | 3755                | 803                  | 1.63                      |
| hsa-miR-2681-5p  | 481                 | 15051                | 12339               | 2372                 | 6.08                      |
| hsa-miR-30b-3p   | 1317                | 15181                | 13914               | 2884                 | 16.95                     |
| hsa-miR-30c-1-3p | 737                 | 27879                | 28071               | 6565                 | 6.69                      |
| hsa-miR-30d-3p   | 1985                | 11928                | 12472               | 4393                 | 11.68                     |
| hsa-miR-3145-5p  | 756                 | 1547                 | 13551               | 27001                | 4.11                      |
| hsa-miR-3146     | 703                 | 10723                | 9364                | 1159                 | 2.26                      |
| hsa-miR-3153     | 513                 | 14634                | 14254               | 3146                 | 8.01                      |
| hsa-miR-3162-5p  | 692                 | 11473                | 13051               | 3257                 | 17.54                     |
| hsa-miR-3164     | 1380                | 9920                 | 10684               | 2111                 | 11.08                     |
| hsa-miR-3184-5p  | 529                 | 4644                 | 3127                | 1463                 | 4.47                      |
| hsa-miR-3196     | 412                 | 515                  | 2294                | 4346                 | 5.57                      |
| hsa-miR-34a-3p   | 928                 | 7841                 | 6115                | 1635                 | 2.31                      |
| hsa-miR-3672     | 9561                | 1575                 | 1360                | 4180                 | 0.50                      |
| hsa-miR-3675-3p  | 4327                | 4987                 | 4155                | 14690                | 4.71                      |
| hsa-miR-371b-5p  | 28252               | 970                  | 636                 | 15277                | 0.31                      |
| hsa-miR-374c-3p  | 488                 | 16467                | 16424               | 3765                 | 4.30                      |
| hsa-miR-378a-5p  | 11277               | 33246                | 36931               | 13305                | 2.27                      |
| hsa-miR-3908     | 1094                | 15529                | 14541               | 3373                 | 11.09                     |
| hsa-miR-3935     | 537                 | 14102                | 9829                | 3627                 | 2.17                      |
| hsa-miR-4284     | 441                 | 7075                 | 6539                | 725                  | 8.57                      |
| hsa-miR-431-3p   | 926                 | 26394                | 21277               | 10260                | 15.13                     |

|                        |       |       |       |       |       |
|------------------------|-------|-------|-------|-------|-------|
| <b>hsa-miR-4322</b>    | 504   | 11689 | 6945  | 1054  | 8.76  |
| <b>hsa-miR-4329</b>    | 3599  | 37035 | 39209 | 11812 | 6.47  |
| <b>hsa-miR-4418</b>    | 612   | 10967 | 9371  | 1956  | 10.69 |
| <b>hsa-miR-4444</b>    | 673   | 10185 | 8032  | 1895  | 11.47 |
| <b>hsa-miR-4446-3p</b> | 1646  | 13211 | 11880 | 1929  | 9.99  |
| <b>hsa-miR-4461</b>    | 524   | 9177  | 6991  | 856   | 8.21  |
| <b>hsa-miR-4472</b>    | 492   | 12258 | 7935  | 1497  | 6.54  |
| <b>hsa-miR-4474-3p</b> | 501   | 16540 | 17177 | 2575  | 8.92  |
| <b>hsa-miR-4476</b>    | 472   | 7507  | 5536  | 1044  | 12.12 |
| <b>hsa-miR-4478</b>    | 779   | 9952  | 8633  | 5058  | 19.50 |
| <b>hsa-miR-4482-5p</b> | 484   | 939   | 1150  | 3148  | 8.25  |
| <b>hsa-miR-4484</b>    | 616   | 5354  | 6011  | 1445  | 10.65 |
| <b>hsa-miR-4495</b>    | 506   | 10578 | 11778 | 1843  | 2.24  |
| <b>hsa-miR-449a</b>    | 524   | 10721 | 10284 | 1371  | 14.23 |
| <b>hsa-miR-4502</b>    | 2749  | 15664 | 15244 | 18080 | 12.98 |
| <b>hsa-miR-4507</b>    | 691   | 12581 | 11140 | 2335  | 11.46 |
| <b>hsa-miR-4508</b>    | 535   | 15235 | 10249 | 5958  | 6.06  |
| <b>hsa-miR-450a-5p</b> | 515   | 13725 | 10434 | 5608  | 10.51 |
| <b>hsa-miR-450b-5p</b> | 465   | 10215 | 8594  | 1541  | 18.76 |
| <b>hsa-miR-4515</b>    | 1217  | 14161 | 13311 | 3235  | 18.03 |
| <b>hsa-miR-4516</b>    | 1285  | 24272 | 24816 | 6728  | 12.06 |
| <b>hsa-miR-4522</b>    | 2999  | 16253 | 15327 | 3679  | 7.13  |
| <b>hsa-miR-4640-3p</b> | 2943  | 859   | 715   | 7431  | 7.18  |
| <b>hsa-miR-4646-3p</b> | 1020  | 9174  | 10260 | 1556  | 2.49  |
| <b>hsa-miR-4652-3p</b> | 31329 | 1984  | 1407  | 10945 | 0.25  |
| <b>hsa-miR-4677-5p</b> | 534   | 6339  | 3400  | 975   | 6.03  |
| <b>hsa-miR-4706</b>    | 1296  | 16999 | 14658 | 1500  | 9.19  |
| <b>hsa-miR-4715-5p</b> | 583   | 10523 | 8492  | 816   | 5.44  |
| <b>hsa-miR-4732-5p</b> | 459   | 7080  | 5134  | 810   | 8.89  |
| <b>hsa-miR-4739</b>    | 439   | 3576  | 4135  | 1773  | 8.95  |
| <b>hsa-miR-4750</b>    | 570   | 11876 | 9776  | 1247  | 7.54  |
| <b>hsa-miR-4793-5p</b> | 931   | 12926 | 10451 | 2639  | 6.34  |
| <b>hsa-miR-485-5p</b>  | 2126  | 13614 | 14122 | 2208  | 11.43 |
| <b>hsa-miR-493-5p</b>  | 1865  | 7491  | 3836  | 6130  | 7.92  |
| <b>hsa-miR-5092</b>    | 620   | 19903 | 19179 | 4477  | 3.81  |
| <b>hsa-miR-5096</b>    | 3611  | 3844  | 11017 | 32195 | 3.20  |
| <b>hsa-miR-526b-5p</b> | 526   | 5882  | 4993  | 862   | 5.50  |
| <b>hsa-miR-541-5p</b>  | 537   | 6991  | 6083  | 843   | 9.41  |
| <b>hsa-miR-618</b>     | 645   | 30247 | 22644 | 4228  | 7.23  |
| <b>hsa-miR-644b-3p</b> | 513   | 40087 | 39141 | 8967  | 6.37  |
| <b>hsa-miR-662</b>     | 812   | 12058 | 10642 | 2518  | 8.51  |
| <b>hsa-miR-767-3p</b>  | 967   | 2975  | 2761  | 5681  | 7.33  |
| <b>hsa-miR-767-5p</b>  | 5182  | 23261 | 23596 | 6076  | 4.64  |
| <b>hsa-miR-769-5p</b>  | 5511  | 41482 | 40317 | 14841 | 8.16  |
| <b>hsa-miR-876-3p</b>  | 28942 | 43483 | 39932 | 49376 | 8.64  |
| <b>hsa-miR-876-5p</b>  | 10690 | 5379  | 4989  | 5926  | 0.41  |
| <b>hsa-miR-888-3p</b>  | 3676  | 3140  | 1383  | 5827  | 2.91  |
| <b>hsa-miR-891b</b>    | 961   | 563   | 7496  | 7773  | 5.37  |

**Supporting Table 2. The predicted result of 4 groups with 4 formulas of the 88-microRNA signature in the training set.**

| Sample | Group | Predict value for HC | Predict value for CHB | Predict value for LC | Predict value for HCC | Sensitivity (%) |
|--------|-------|----------------------|-----------------------|----------------------|-----------------------|-----------------|
| 1      | HC    | 4552                 | 4178                  | 4265                 | 4284                  | 100             |
| 2      | HC    | 4504                 | 4384                  | 4489                 | 4454                  |                 |
| 3      | HC    | 8463                 | 6548                  | 7801                 | 8143                  |                 |
| 4      | HC    | 9632                 | 7446                  | 8975                 | 9418                  |                 |
| 5      | HC    | 15401                | 12944                 | 14413                | 15242                 |                 |
| 6      | HC    | 15665                | 12893                 | 15566                | 15032                 |                 |
| 7      | HC    | 19610                | 15261                 | 18812                | 18791                 |                 |
| 8      | HC    | 15262                | 12667                 | 15218                | 14618                 |                 |
| 9      | HC    | 16200                | 13130                 | 15917                | 15578                 |                 |
| 10     | HC    | 17159                | 13400                 | 16289                | 16308                 |                 |
| 11     | HC    | 16710                | 13182                 | 16015                | 16100                 |                 |
| 12     | HC    | 20816                | 16000                 | 19704                | 20421                 |                 |
| 13     | HC    | 16563                | 13264                 | 16109                | 15978                 |                 |
| 14     | HC    | 17101                | 13753                 | 16696                | 16458                 |                 |
| 15     | HC    | 6141                 | 4746                  | 5464                 | 5803                  |                 |
| 16     | HC    | 8651                 | 6566                  | 8010                 | 8603                  |                 |
| 17     | HC    | 11657                | 9837                  | 10276                | 10457                 |                 |
| 18     | HC    | 9224                 | 7219                  | 8768                 | 9187                  |                 |
| 19     | HC    | 9043                 | 6740                  | 8198                 | 8818                  |                 |
| 20     | HC    | 8516                 | 6368                  | 7752                 | 8336                  |                 |
| 21     | HC    | 9360                 | 7399                  | 8877                 | 9290                  |                 |
| 22     | HC    | 9070                 | 6730                  | 8305                 | 8940                  |                 |
| 23     | HC    | 10033                | 7518                  | 9285                 | 9973                  |                 |
| 24     | HC    | 6583                 | 5702                  | 6537                 | 6314                  |                 |
| 25     | HC    | 8398                 | 6698                  | 8111                 | 8147                  |                 |
| 26     | HC    | 8290                 | 7228                  | 7697                 | 7463                  |                 |
| 27     | HC    | 7132                 | 5165                  | 6150                 | 6827                  |                 |
| 28     | HC    | 13480                | 11213                 | 13006                | 13374                 |                 |
| 29     | HC    | 8834                 | 6867                  | 8483                 | 8705                  |                 |
| 30     | HC    | 10678                | 8326                  | 10122                | 10613                 |                 |
| 31     | CHB   | 8030                 | 10835                 | 9766                 | 10648                 | 100             |
| 32     | CHB   | 10620                | 10656                 | 9645                 | 7998                  |                 |
| 33     | CHB   | 8032                 | 10841                 | 9768                 | 10648                 |                 |
| 34     | CHB   | 3218                 | 3534                  | 3074                 | 3498                  |                 |
| 35     | CHB   | 7273                 | 7395                  | 7206                 | 6591                  |                 |
| 36     | CHB   | 3650                 | 3720                  | 3228                 | 3715                  |                 |
| 37     | CHB   | 3645                 | 3723                  | 3226                 | 3716                  |                 |
| 38     | CHB   | 3305                 | 3593                  | 3156                 | 3592                  |                 |

|    |     |       |       |       |       |
|----|-----|-------|-------|-------|-------|
| 39 | CHB | 5315  | 7438  | 5931  | 6374  |
| 40 | CHB | 2955  | 3785  | 2485  | 2844  |
| 41 | CHB | 4523  | 4565  | 3962  | 2986  |
| 42 | CHB | 6551  | 7600  | 6839  | 6490  |
| 43 | CHB | 6609  | 9424  | 7196  | 7883  |
| 44 | CHB | 5095  | 5694  | 5006  | 4309  |
| 45 | CHB | 4996  | 5182  | 4901  | 4293  |
| 46 | CHB | 7942  | 8617  | 7814  | 7439  |
| 47 | CHB | 2880  | 3766  | 3213  | 3014  |
| 48 | CHB | 3775  | 5248  | 3665  | 3795  |
| 49 | CHB | 1489  | 1827  | 692   | 653   |
| 50 | CHB | 3192  | 4205  | 2738  | 3390  |
| 51 | CHB | 13992 | 14170 | 14126 | 11647 |
| 52 | CHB | 14149 | 14313 | 14019 | 11523 |
| 53 | CHB | 19042 | 19168 | 18139 | 14635 |
| 54 | CHB | 8124  | 10642 | 9015  | 8189  |
| 55 | CHB | 5688  | 7949  | 7311  | 5784  |
| 56 | CHB | 5806  | 8147  | 7474  | 5916  |
| 57 | CHB | 5889  | 6766  | 6141  | 5218  |
| 58 | CHB | -837  | 843   | -732  | -1497 |
| 59 | CHB | -1603 | -337  | -1957 | -2687 |
| 60 | CHB | 2599  | 3261  | 2861  | 3093  |
| 61 | LC  | 3403  | 3593  | 5839  | 4162  |
| 62 | LC  | 10686 | 9267  | 12490 | 11012 |
| 63 | LC  | 5061  | 4702  | 6919  | 6564  |
| 64 | LC  | 4941  | 4941  | 5928  | 4727  |
| 65 | LC  | 310   | 1564  | 2233  | 402   |
| 66 | LC  | 6524  | 6218  | 7446  | 6378  |
| 67 | LC  | 5745  | 5345  | 6544  | 5374  |
| 68 | LC  | 4132  | 4017  | 4407  | 3038  |
| 69 | LC  | 4175  | 4072  | 5883  | 5050  |
| 70 | LC  | 5008  | 5322  | 5516  | 4357  |
| 71 | LC  | 4672  | 4954  | 5360  | 4108  |
| 72 | LC  | 4421  | 4257  | 6142  | 5332  |
| 73 | LC  | 3648  | 3989  | 5148  | 3377  |
| 74 | LC  | 3788  | 3873  | 5010  | 3684  |
| 75 | LC  | 3307  | 3824  | 3900  | 1988  |
| 76 | LC  | 3665  | 3677  | 4493  | 2213  |
| 77 | LC  | 5409  | 5433  | 5445  | 4569  |
| 78 | LC  | 6663  | 5681  | 9574  | 8485  |
| 79 | LC  | 5203  | 5085  | 6413  | 4692  |
| 80 | LC  | -3694 | -4278 | -2480 | -5655 |
| 81 | LC  | -1628 | -1021 | 591   | -2288 |
| 82 | LC  | 15924 | 12922 | 16188 | 16177 |

100

|     |     |       |       |       |       |
|-----|-----|-------|-------|-------|-------|
| 83  | LC  | 14496 | 12149 | 14745 | 14630 |
| 84  | LC  | 13017 | 11159 | 13235 | 13154 |
| 85  | LC  | 12652 | 10431 | 12780 | 12373 |
| 86  | LC  | 6354  | 7772  | 8623  | 6385  |
| 87  | LC  | 9104  | 9612  | 11448 | 9356  |
| 88  | LC  | 6255  | 8182  | 9009  | 6428  |
| 89  | LC  | 8271  | 7746  | 8767  | 8268  |
| 90  | LC  | 4638  | 4647  | 5454  | 4812  |
| 91  | HCC | 13410 | 10316 | 13160 | 13867 |
| 92  | HCC | 10013 | 9145  | 11110 | 11001 |
| 93  | HCC | 15483 | 12301 | 15487 | 16531 |
| 94  | HCC | 14641 | 10974 | 13978 | 15339 |
| 95  | HCC | 2706  | 2199  | 2831  | 2968  |
| 96  | HCC | 6307  | 5400  | 5988  | 6863  |
| 97  | HCC | 400   | 1686  | 212   | 2726  |
| 98  | HCC | 4614  | 3272  | 2818  | 6317  |
| 99  | HCC | 11349 | 9994  | 11160 | 12202 |
| 100 | HCC | 7670  | 6280  | 6390  | 8935  |
| 101 | HCC | 7343  | 5606  | 6421  | 9136  |
| 102 | HCC | 7370  | 6309  | 7256  | 8953  |
| 103 | HCC | 13666 | 11880 | 14194 | 14257 |
| 104 | HCC | 13948 | 11916 | 14356 | 14416 |
| 105 | HCC | 15522 | 13139 | 15882 | 16167 |
| 106 | HCC | 15822 | 13245 | 16093 | 16453 |
| 107 | HCC | 24717 | 18090 | 22489 | 25030 |
| 108 | HCC | 20723 | 16102 | 19479 | 20969 |
| 109 | HCC | 7471  | 7461  | 10112 | 8432  |
| 110 | HCC | 6215  | 7521  | 6031  | 8733  |
| 111 | HCC | 5789  | 4763  | 5717  | 6328  |
| 112 | HCC | 7495  | 7523  | 7411  | 8746  |
| 113 | HCC | 6778  | 5906  | 6927  | 7218  |
| 114 | HCC | 4645  | 5094  | 4124  | 5641  |
| 115 | HCC | 7581  | 6938  | 7086  | 8345  |
| 116 | HCC | 3207  | 2819  | 4524  | 4726  |
| 117 | HCC | 2854  | 2364  | 4123  | 4346  |
| 118 | HCC | 6013  | 6407  | 5765  | 7273  |
| 119 | HCC | 5992  | 5676  | 5771  | 6331  |
| 120 | HCC | 6398  | 5846  | 6258  | 6689  |
| 121 | HCC | 4723  | 4856  | 4453  | 5015  |
| 122 | HCC | 4264  | 4920  | 4055  | 5037  |
| 123 | HCC | 10174 | 9750  | 10384 | 11289 |
| 124 | HCC | 5104  | 5353  | 4732  | 5848  |
| 125 | HCC | 10239 | 8631  | 10287 | 10487 |
| 126 | HCC | 10079 | 10325 | 9886  | 12011 |

100

|     |     |       |       |       |              |
|-----|-----|-------|-------|-------|--------------|
| 127 | HCC | 11982 | 10831 | 12217 | <b>13024</b> |
| 128 | HCC | 6397  | 6641  | 6407  | <b>7133</b>  |
| 129 | HCC | 8151  | 8415  | 8210  | <b>9563</b>  |
| 130 | HCC | 9516  | 8229  | 9740  | <b>9766</b>  |
| 131 | HCC | 8488  | 7150  | 8559  | <b>8714</b>  |
| 132 | HCC | 8264  | 6829  | 8237  | <b>8698</b>  |
| 133 | HCC | 8324  | 6895  | 8139  | <b>8518</b>  |
| 134 | HCC | 11699 | 9787  | 11747 | <b>12082</b> |
| 135 | HCC | 8348  | 7012  | 8407  | <b>8620</b>  |
| 136 | HCC | 7299  | 6133  | 7399  | <b>7768</b>  |
| 137 | HCC | 8693  | 7287  | 8682  | <b>8936</b>  |
| 138 | HCC | 5657  | 5325  | 6015  | <b>6270</b>  |
| 139 | HCC | 8687  | 7174  | 8593  | <b>8883</b>  |
| 140 | HCC | 8777  | 6907  | 8285  | <b>9091</b>  |
| 141 | HCC | 8933  | 7073  | 8493  | <b>9272</b>  |
| 142 | HCC | 8545  | 6808  | 8129  | <b>8887</b>  |
| 143 | HCC | 8816  | 7287  | 8779  | <b>9035</b>  |
| 144 | HCC | 8442  | 6805  | 8130  | <b>8775</b>  |
| 145 | HCC | 8700  | 6475  | 7905  | <b>9013</b>  |
| 146 | HCC | 8200  | 6571  | 7845  | <b>8487</b>  |
| 147 | HCC | 10033 | 9158  | 11021 | <b>11130</b> |
| 148 | HCC | 394   | 1682  | 209   | <b>2721</b>  |
| 149 | HCC | 4614  | 3272  | 2818  | <b>6317</b>  |
| 150 | HCC | 7215  | 5451  | 6244  | <b>9039</b>  |

**Supporting Table 3. The predicted result of 4 groups with 4 formulas of the 88-microRNA signature in the validation set.**

| Sample | Group | Predict value for HC | Predict value for CHB | Predict value for LC | Predict value for HCC | Accuracy (%) |
|--------|-------|----------------------|-----------------------|----------------------|-----------------------|--------------|
| 1      | HC    | <b>7044</b>          | 5069                  | 5610                 | 6491                  | <b>100</b>   |
| 2      | HC    | <b>7066</b>          | 4706                  | 5285                 | 6398                  |              |
| 3      | HC    | <b>7093</b>          | 5076                  | 5629                 | 6538                  |              |
| 4      | HC    | <b>7072</b>          | 4709                  | 5290                 | 6404                  |              |
| 5      | HC    | <b>7226</b>          | 5016                  | 5606                 | 6654                  |              |
| 6      | HC    | <b>6286</b>          | 4154                  | 4524                 | 5603                  |              |
| 7      | HC    | <b>5586</b>          | 3958                  | 4128                 | 4957                  |              |
| 8      | HC    | <b>6262</b>          | 4693                  | 5172                 | 5805                  |              |
| 9      | HC    | <b>17889</b>         | 15450                 | 18354                | 17390                 |              |
| 10     | HC    | <b>7044</b>          | 5069                  | 5610                 | 6491                  |              |
| 11     | HC    | <b>21047</b>         | 16678                 | 20381                | 19461                 |              |
| 12     | HC    | <b>21892</b>         | 17031                 | 20741                | 19931                 |              |
| 13     | HC    | <b>19236</b>         | 15373                 | 18707                | 17828                 |              |

|    |     |       |       |       |       |      |
|----|-----|-------|-------|-------|-------|------|
| 14 | CHB | 11605 | 15419 | 13445 | 12608 |      |
| 15 | CHB | 15076 | 17851 | 15616 | 16084 |      |
| 16 | CHB | 5069  | 7044  | 5610  | 6491  |      |
| 17 | CHB | 4706  | 7066  | 5285  | 6398  |      |
| 18 | CHB | 5076  | 7093  | 5629  | 6538  |      |
| 19 | CHB | 4709  | 7072  | 5290  | 6404  |      |
| 20 | CHB | 5016  | 7226  | 5606  | 6654  |      |
| 21 | CHB | 13557 | 12197 | 14499 | 14023 | 80   |
| 22 | CHB | 15860 | 16371 | 16223 | 13315 |      |
| 23 | CHB | 16839 | 17482 | 16989 | 13885 |      |
| 24 | CHB | 16148 | 16713 | 16646 | 13660 |      |
| 25 | CHB | 17134 | 17769 | 17215 | 14029 |      |
| 26 | CHB | 13663 | 12150 | 14461 | 14049 |      |
| 27 | CHB | 12435 | 10845 | 12782 | 12730 |      |
| 28 | CHB | 18529 | 19499 | 18946 | 15517 |      |
| 29 | LC  | 15420 | 14404 | 16653 | 15935 |      |
| 30 | LC  | 16483 | 15971 | 18473 | 17256 |      |
| 31 | LC  | 14931 | 13816 | 16098 | 15491 |      |
| 32 | LC  | 15428 | 14168 | 16677 | 16053 |      |
| 33 | LC  | 16747 | 15859 | 18395 | 17363 |      |
| 34 | LC  | 15533 | 15132 | 17574 | 16449 |      |
| 35 | LC  | 16107 | 14771 | 17534 | 16723 |      |
| 36 | LC  | 13777 | 15485 | 17987 | 14604 |      |
| 37 | LC  | 13741 | 15445 | 17937 | 14559 |      |
| 38 | LC  | 8681  | 11819 | 13062 | 9468  |      |
| 39 | LC  | 12508 | 13591 | 15930 | 13976 |      |
| 40 | LC  | 13387 | 13848 | 15855 | 14256 |      |
| 41 | LC  | 2983  | 3131  | 4284  | 3766  |      |
| 42 | LC  | 16857 | 14217 | 17405 | 17684 | 93.4 |
| 43 | LC  | 14805 | 528   | 15416 | 15253 |      |
| 44 | HCC | 15688 | 12699 | 15663 | 16662 |      |
| 45 | HCC | 17843 | 15853 | 19076 | 19571 |      |
| 46 | HCC | 19323 | 16484 | 20004 | 20806 |      |
| 47 | HCC | 18556 | 15138 | 18499 | 19666 |      |
| 48 | HCC | 18612 | 15160 | 18482 | 19556 |      |
| 49 | HCC | 18760 | 15803 | 19196 | 19919 |      |
| 50 | HCC | 20100 | 16522 | 20302 | 21222 |      |
| 51 | HCC | 19042 | 15695 | 19162 | 20184 |      |
| 52 | HCC | 18647 | 15154 | 18482 | 19675 |      |
| 53 | HCC | 19023 | 15259 | 18746 | 19791 |      |
| 54 | HCC | 19308 | 15930 | 19507 | 20620 |      |
| 55 | HCC | 17903 | 14715 | 17790 | 18620 |      |

|    |     |       |       |       |              |
|----|-----|-------|-------|-------|--------------|
| 56 | HCC | 17166 | 14242 | 17294 | <b>18021</b> |
| 57 | HCC | 20114 | 17136 | 21035 | <b>21489</b> |
| 58 | HCC | 18941 | 15653 | 19108 | <b>20107</b> |
| 59 | HCC | 20871 | 17311 | 21280 | <b>22247</b> |
| 60 | HCC | 17506 | 14956 | 18059 | <b>18644</b> |
| 61 | HCC | 16130 | 13704 | 16695 | <b>16736</b> |
| 62 | HCC | 15218 | 12848 | 15514 | <b>15547</b> |
| 63 | HCC | 16059 | 13553 | 16513 | <b>16584</b> |

**Supporting Table 4. HCC diagnostic efficiency of 88-microRNA and AFP on 213 subjects.**

|                             |                   | HCC case<br>N (%) | Non-HCC case<br>N (%) | Total cases |
|-----------------------------|-------------------|-------------------|-----------------------|-------------|
| <b>Signature prediction</b> | <b>Cancer</b>     | 80 (100)          | 1 (0.8)               | 81          |
|                             | <b>Non-cancer</b> | 0 (0.0)           | 132 (99.2)            | 132         |
| <b>AFP prediction</b>       | <b>Cancer</b>     | 51 (63.8)         | 21 (15.8)             | 72          |
|                             | <b>Non-cancer</b> | 29 (36.2)         | 112 (84.2)            | 141         |
| <b>Total cases</b>          |                   | 80                | 133                   | 213         |
